# Supplementary material for: Dual electrocatalysis enables enantioselective hydrocyanation of conjugated alkenes
Source: Springer Nature journal article supplement (doi:10.1038/s41557-020-0469-5), 2020-06-29
Supplement: 41557_2020_469_MOESM48_ESM.mol [file 41557_2020_469_MOESM48_ESM.mol]

nchem.19091927B-comp15.mol
  ChemDraw03272013582D

 16 17  0  0  1  0  0  0  0  0999 V2000
   -1.7864   -0.0000    0.0000 C   0  0  0  0  0  0  0  0  0  0  0  0
   -1.7864   -0.8250    0.0000 C   0  0  0  0  0  0  0  0  0  0  0  0
   -1.0720   -1.2376    0.0000 C   0  0  0  0  0  0  0  0  0  0  0  0
   -0.3575   -0.8250    0.0000 C   0  0  0  0  0  0  0  0  0  0  0  0
   -0.3575   -0.0000    0.0000 C   0  0  0  0  0  0  0  0  0  0  0  0
   -1.0720    0.4125    0.0000 C   0  0  0  0  0  0  0  0  0  0  0  0
    0.3569   -1.2376    0.0000 C   0  0  0  0  0  0  0  0  0  0  0  0
    1.0714   -0.8250    0.0000 C   0  0  0  0  0  0  0  0  0  0  0  0
    1.0714   -0.0000    0.0000 C   0  0  0  0  0  0  0  0  0  0  0  0
    0.3569    0.4125    0.0000 C   0  0  0  0  0  0  0  0  0  0  0  0
    1.7859    0.4125    0.0000 C   0  0  0  0  0  0  0  0  0  0  0  0
   -2.5009   -1.2376    0.0000 O   0  0  0  0  0  0  0  0  0  0  0  0
   -2.5009   -2.0597    0.0000 C   0  0  0  0  0  0  0  0  0  0  0  0
    2.5009   -0.0000    0.0000 C   0  0  0  0  0  0  0  0  0  0  0  0
    1.7859    1.2376    0.0000 C   0  0  0  0  0  0  0  0  0  0  0  0
    1.7859    2.0597    0.0000 N   0  0  0  0  0  0  0  0  0  0  0  0
 12 13  1  0      
  2 12  1  0      
 11 14  1  0      
 15 16  3  0      
 11 15  1  6      
  1  2  2  0      
  2  3  1  0      
  3  4  2  0      
  4  5  1  0      
  5  6  2  0      
  6  1  1  0      
  4  7  1  0      
  7  8  2  0      
  8  9  1  0      
  9 10  2  0      
 10  5  1  0      
  9 11  1  0      
M  STY  1   1 SUP
M  SLB  1   1   1
M  SAL   1  2  12  13
M  SBL   1  1   2
M  SMT   1 OMe
M  SBV   1   2    0.7145    0.4125
M  STY  1   2 SUP
M  SLB  1   2   2
M  SAL   2  1  14
M  SBL   2  1   3
M  SMT   2 Me
M  SBV   2   3   -0.7150    0.4125
M  STY  1   3 SUP
M  SLB  1   3   3
M  SAL   3  2  15  16
M  SBL   3  1   5
M  SMT   3 CN
M  SBV   3   5    0.0000   -0.8250
M  END
